# Supplementary material for: Conformal oxide nanocoatings on electrodeposited 3D porous Ni films by atomic layer deposition
Source: Royal Society of Chemistry journal article supplement (doi:10.1039/c6tc02656g), 2016-01-01
Supplement: c6tc02656g1.pdf [file c6tc02656g1.pdf]

## SUPPORTING INFORMATION

### Conformal oxide nanocoatings on electrodeposited 3D porous Ni films by atomic layer deposition

J. Zhang,<sup>a</sup> M. Coll,<sup>b\*</sup> T. Puig,<sup>b</sup> E. Pellicer<sup>a\*</sup> and J. Sort<sup>c\*</sup>

<sup>a</sup>Departament de Física, Universitat Autònoma de Barcelona, E-08193 Bellaterra, Barcelona, Catalonia, Spain. \*Email: eva.pellicer@uab.cat

<sup>b</sup>Institut de Ciència de Materials de Barcelona (ICMAB-CSIC), Campus UAB, E-08193, Bellaterra, Catalonia, Spain. \*Email: mcoll@icmab.es

<sup>c</sup>Institució Catalana de Recerca i Estudis Avançats (ICREA), E-08010 and Departament de Física, Universitat Autònoma de Barcelona, E-08193, Catalonia, Spain. \*Email: Jordi.sort@uab.cat

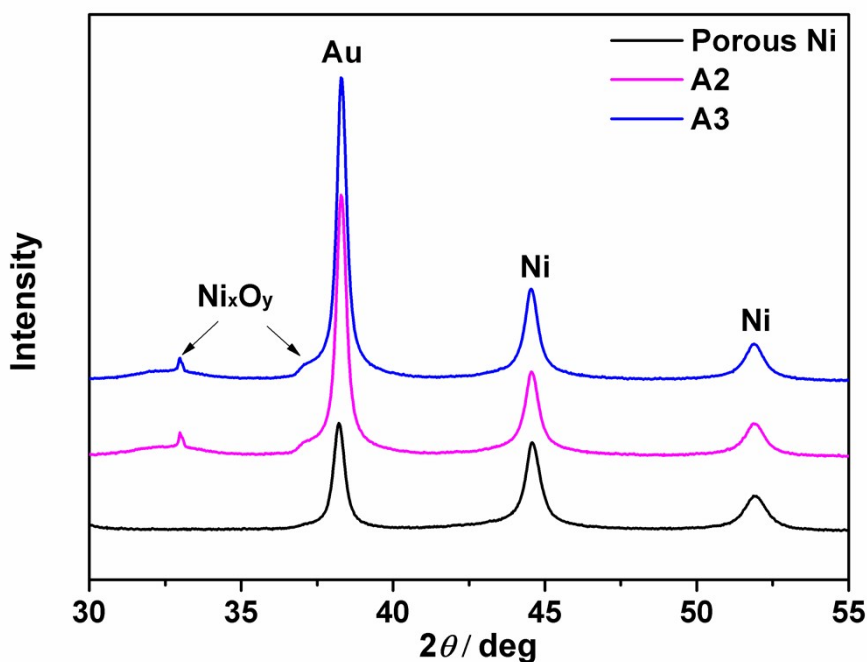

**Fig. S1** XRD patterns of porous uncoated Ni, and A2 and A3 composite samples.

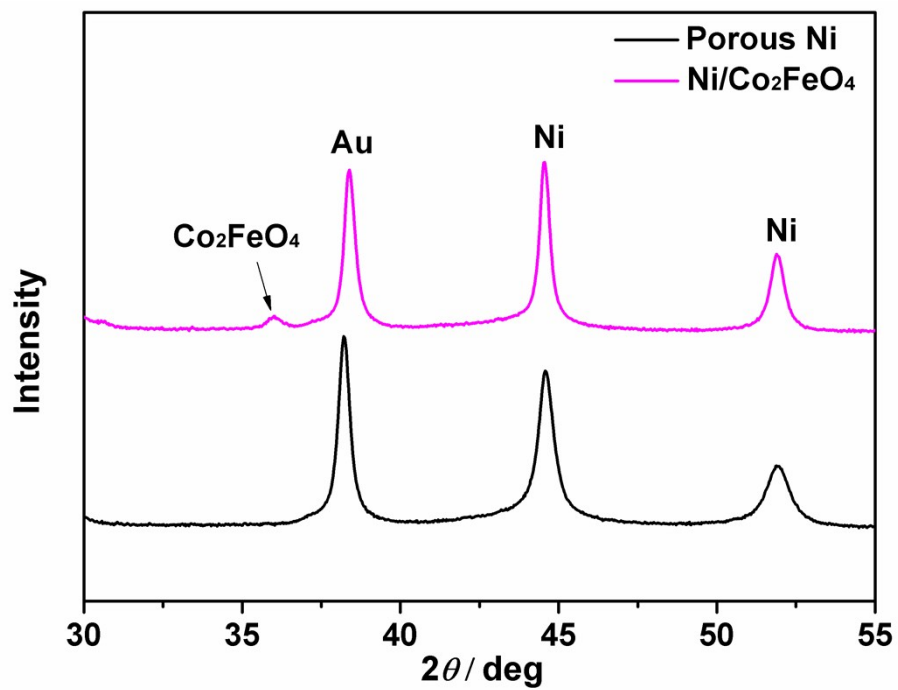

**Fig. S2** XRD patterns of porous uncoated Ni and Ni-supported Co<sub>3-x</sub>Fe<sub>x</sub>O<sub>4</sub> samples.
